# Supplementary material
Source: publisher figshare collection journal article supplement (https://acs.figshare.com/ndownloader/files/12809591)
Supplement: Supplementary file 1 [file 12809591]

# Supporting Information

## **Paclitaxel-induced Ultra-small Gallic Acid- Fe@BSA Self-assembly with Enhanced MRI Performance and Tumor Accumulation for Cancer Theranostics**

*Lu An<sup>‡</sup>, Chenglin Yan<sup>‡</sup>, Xueling Mu, Cheng Tao, Qiwei Tian\*, Jiaomin Lin, Shiping Yang\**

The Key Laboratory of Resource Chemistry of Ministry of Education, Shanghai Key Laboratory of Rare Earth Functional Materials, and shanghai Municipal Education Committee Key Laboratory of Molecular Imaging Probes and Sensors, Shanghai Normal University, Shanghai 200234, China. E-mail: qiweitian@shnu.edu.cn and [shipingy@shnu.edu.cn](mailto:shipingy@shnu.edu.cn)

<sup>‡</sup> These authors contributed equally to this work.

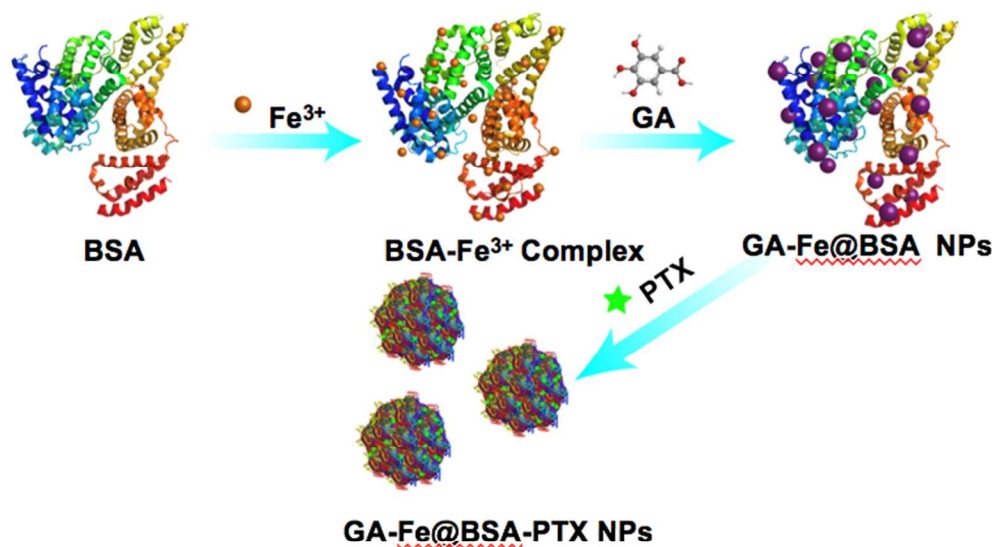

**Figure S1.** Schematic illustration of the fabrication process of GA-Fe@BSA-PTX self-assembled nanoparticles.

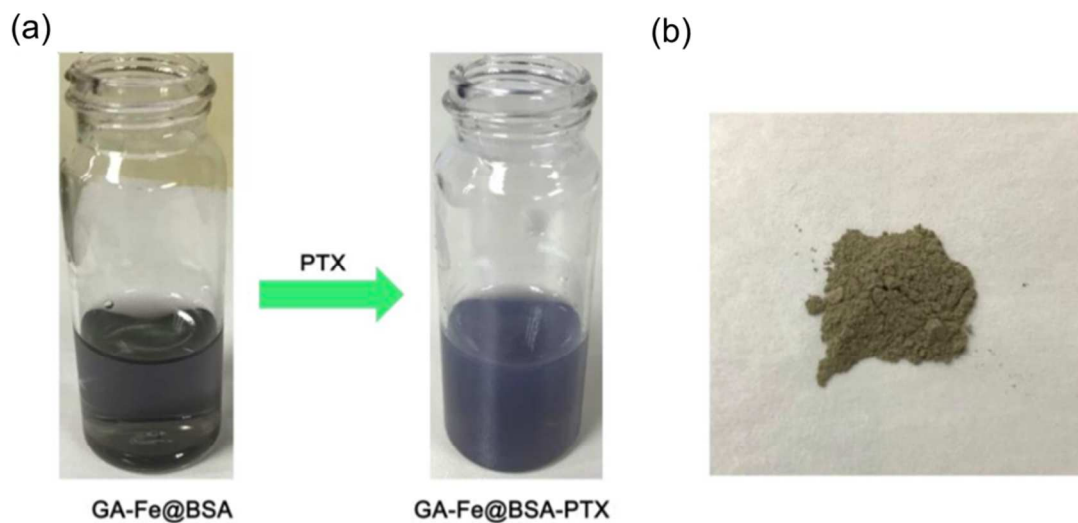

**Figure S2.** (a) photograph of the water dispersion GA-Fe@BSA nanoparticles before and after assembly by PTX; (b) photograph of the GA-Fe@BSA-PTX self-assembled nanoparticles powder synthesized by one time.

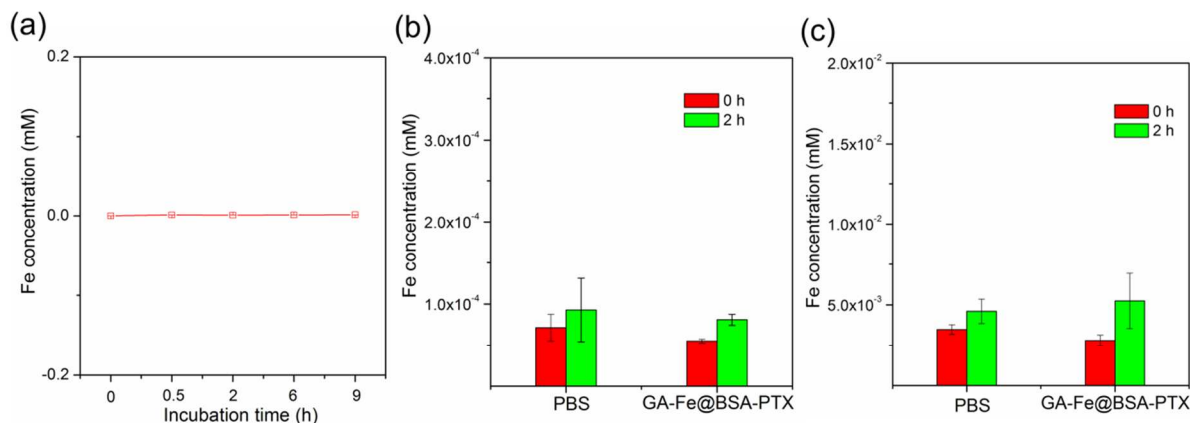

**Figure S3.** Stability of the GA-Fe@BSA-PTX self-assembled nanoparticles *in vitro* and *in vivo*.

(a) *in vitro*: the GA-Fe@BSA-PTX was incubated with Dulbecco's Modified Eagle's Medium (DMEM) plus 10% fetal bovine serum (FBS) to simulate *in vivo* physiological conditions for different time. In order to verify if the GA-Fe@BSA-PTX self-assembled nanoparticles will release the iron ions at the physiological conditions, the Fe content in the DMEM was tested after removing the GA-Fe@BSA-PTX. Nearly no existence of Fe ions was tested in the DMEM incubated without and with GA-Fe@BSA-PTX self-assembled nanoparticles, indicating that there is no release of iron ions at the physiological conditions; (b, c) *in vivo*: the urine (b) and blood (c) of the mice was collected after 2 h of intravenous injection with GA-Fe@BSA-PTX (200  $\mu$ L, 14.5 mM) and PBS (200  $\mu$ L). After removing the GA-Fe@BSA-PTX self-assembled nanoparticles by the ultrafiltration centrifugation (100 kDa polyether sulfone film) from the urine and blood, the Fe ions content in the urine and blood was tested by high-dispersion inductively coupled plasma atomic emission spectroscopy. The results show that there is no obviously difference between GA-Fe@BSA-PTX and PBS group, indication that there is no release of iron ions *in vivo*.

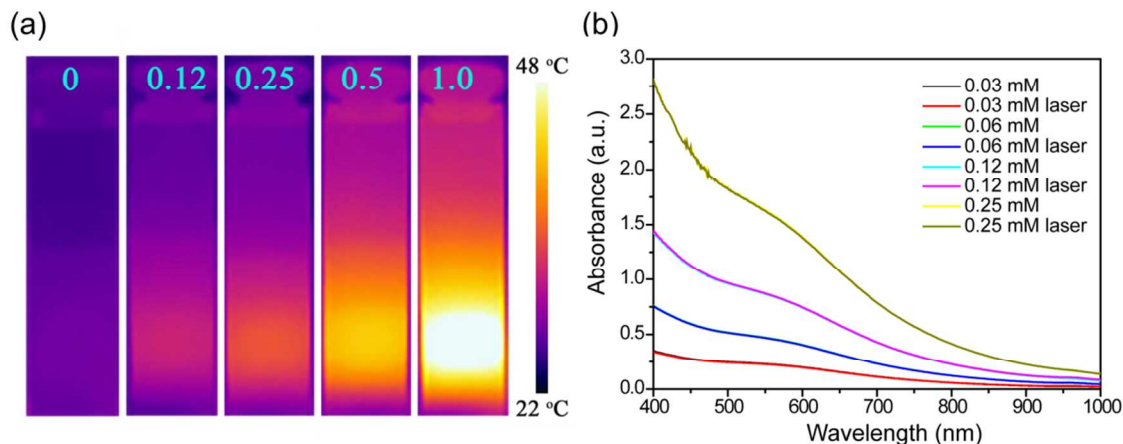

**Figure S4.** (a) NIR-thermal imaging of the of GA-Fe@BSA-PTX self-assembled nanoparticles at increasing concentrations under 808 nm laser irradiation for 15 min at 1 W/cm<sup>2</sup>. (b) Absorption of the GA-Fe@BSA-PTX self-assembled nanoparticles before and after laser irradiation (808 nm, 15 min at 1 W/cm<sup>2</sup>).

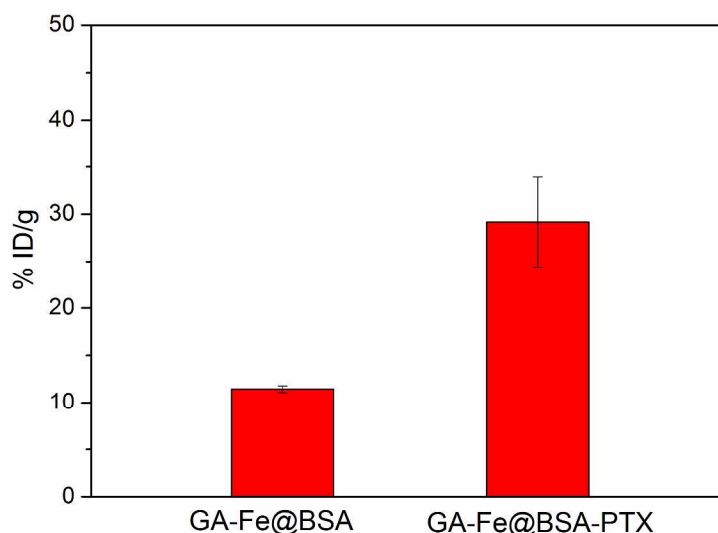

**Figure S5.** Fe ions content in the tumor after 2 h of intravenous injection with GA-Fe@BSA and GA-Fe@BSA-PTX respectively. The Fe ions content in the tumor of the mice after intravenous injection with GA-Fe@BSA-PTX is 29.17 % ID/g, which is much higher than that of the mice injected with GA-Fe@BSA (11.4 % ID/g), indicating the GA-Fe@BSA-PTX can effectively enhance the accumulation in tumor.

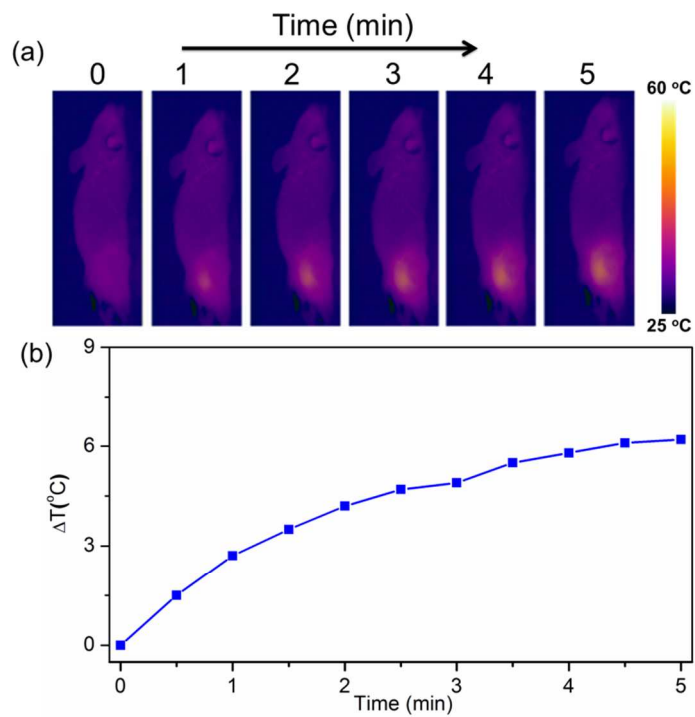

**Figure S6.** NIR thermal images (a) and corresponding temperature variations (b) of mice bearing 4T1 tumors after intravenous injection with GA-Fe@BSA (14.5 mM, 200  $\mu\text{L}$ ) under the laser irradiation (808 nm, 1  $\text{W}/\text{cm}^2$  for 5 min).
